# Supplementary material for: TETs Regulate Proepicardial Cell Migration through Extracellular Matrix Organization during Zebrafish Cardiogenesis
Source: PubMed Central journal article supplement — Cell Rep. Author manuscript; Available in PMC 2019 Feb 7. (PMC6366638; doi:10.1016/j.celrep.2018.12.076), 2019-01-15
Supplement: NIHMS1518822-supplement-1.pdf [file NIHMS1518822-supplement-1.pdf]

**Cell Reports, Volume 26**

**Supplemental Information**

**TETs Regulate Proepicardial Cell Migration  
through Extracellular Matrix Organization  
during Zebrafish Cardiogenesis**

**Yahui Lan, Heng Pan, Cheng Li, Kelly M. Banks, Jessica Sam, Bo Ding, Olivier Elemento, Mary G. Goll, and Todd Evans**

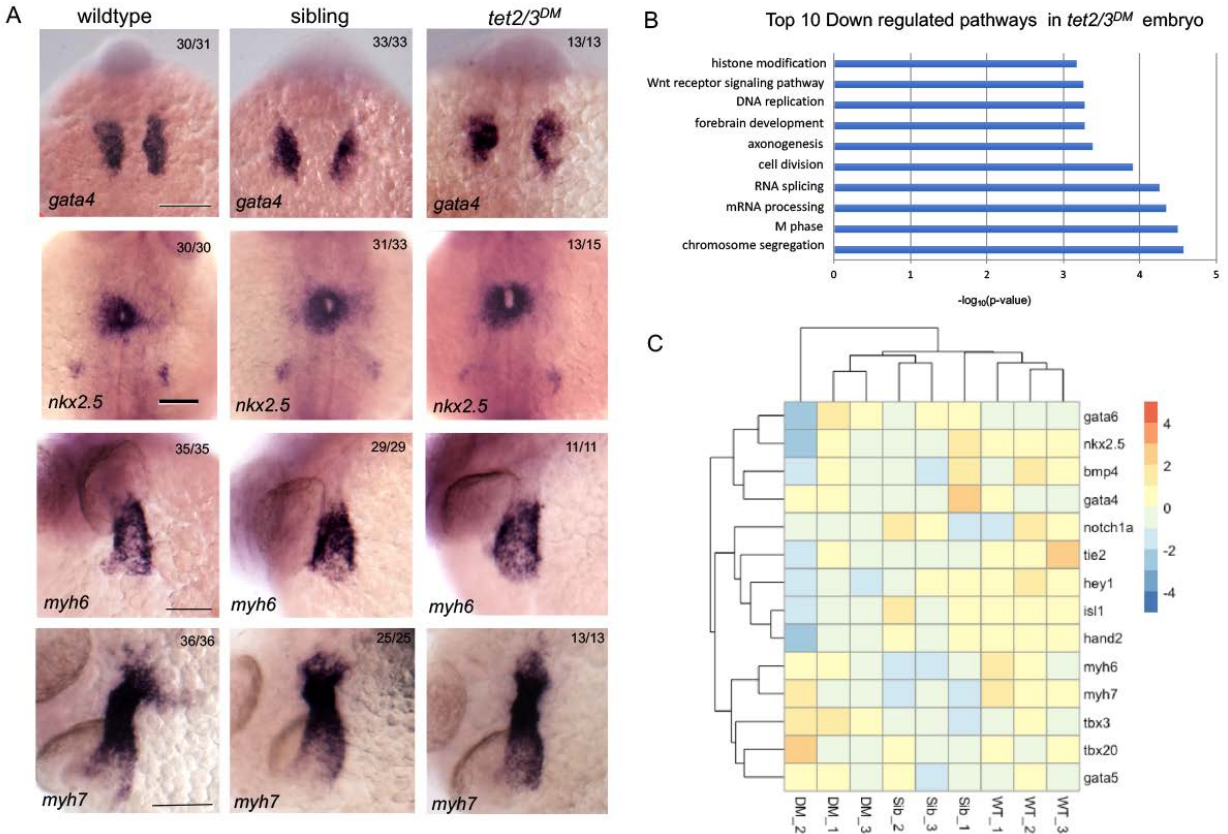

**Figure S1: *tet2/3<sup>DM</sup>* Larvae Show Neuronal but not Cardiac Defects at 28 hpf. Related to Figure 1.**

(A) Markers of cardiac progenitors are similarly expressed in wildtype, sibling and *tet2/3<sup>DM</sup>* larvae. WISH for *gata4* was performed at 18 hpf, *nkx2.5* was performed at 22-hpf, atrial myosin marker *myh6* and myosin marker *myh7* were performed at 28-hpf. Scale bar: 100  $\mu\text{m}$ .

(B) Gene ontology (GO) analysis shows top ten down-regulated biological pathways in 28-hpf *tet2/3<sup>DM</sup>* larvae by RNA sequencing.

(C) Heatmap of RNA sequencing data illustrating similar transcriptional expression of cardiac genes in *tet2/3<sup>DM</sup>* (DM) compared with wildtype (WT) or sibling (Sib) larvae.

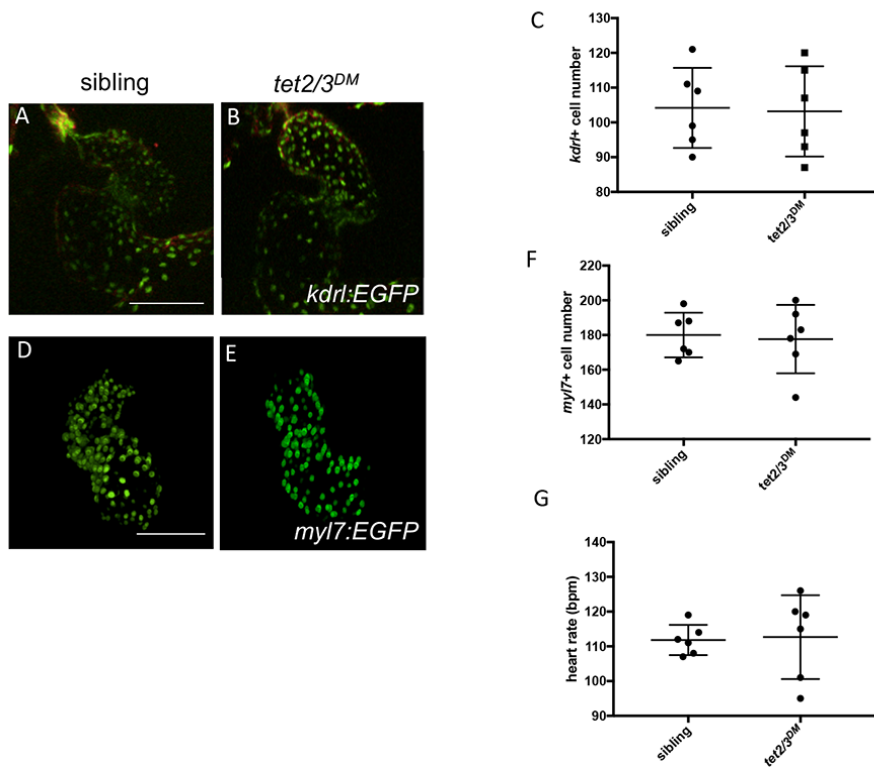

**Figure S2: Normal Myocardium and Endocardium in 2-dpf *tet2/3<sup>DM</sup>* Larvae. Related to Figure 1.**

(A and B) GFP labeled endocardium in 2-dpf larvae carrying the Tg(*kdrl:EGFP-NLS*) transgene.

(C) Graph indicates the number of endocardial cells in 48-hpf sibling and *tet2/3<sup>DM</sup>* larvae. Data are presented as the mean  $\pm$  SD.

(D and E) GFP labeled myocardium in 2-dpf larvae carrying the Tg(*myl7:EGFP*) transgene.

(F) Graph indicates the number of myocardial cells in 48-hpf sibling and *tet2/3<sup>DM</sup>* larvae. Data are presented as the mean  $\pm$  SD.

(G) Graph indicates heart rate in 48-hpf sibling and *tet2/3<sup>DM</sup>* larvae. Heart rate was measured in beats per minute. Data are presented as the mean  $\pm$  SD.

Scale bars: 100  $\mu$ m.

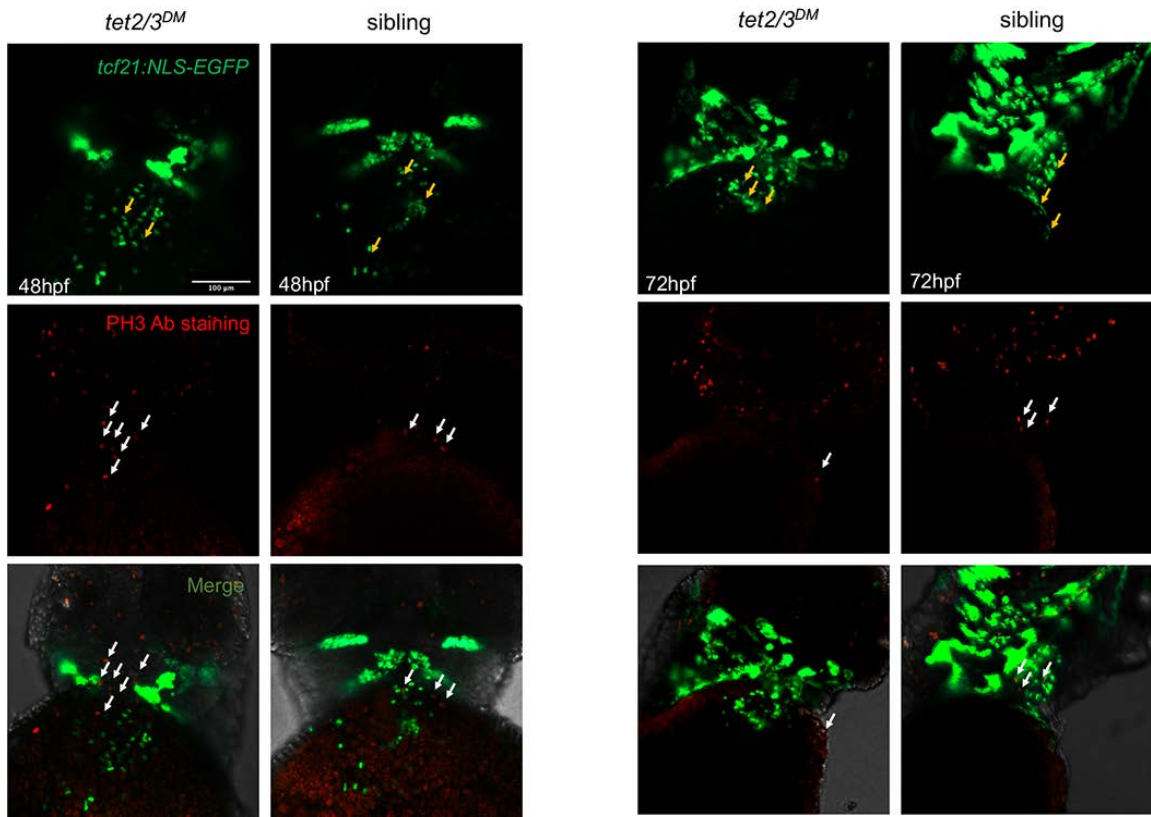

**Figure S3: No PE Cell Proliferation at 48 and 72 hpf Sibling and *tet2/3<sup>DM</sup>* Larvae. Related to Figure 1.** Confocal images showing sibling and *tet2/3<sup>DM</sup>* larvae carrying the Tg(*tcf21:NLS-EGFP*) transgene stained by anti-GFP antibody (Green) plus anti-pH3 antibody (Red). Yellow arrows indicate PE cells. White arrows indicate p3+ proliferating cells. Co-staining shows essentially no cell proliferation of *tcf21*+ PE cells at 48-hpf or 72-hpf. Scale bar: 100 µm.

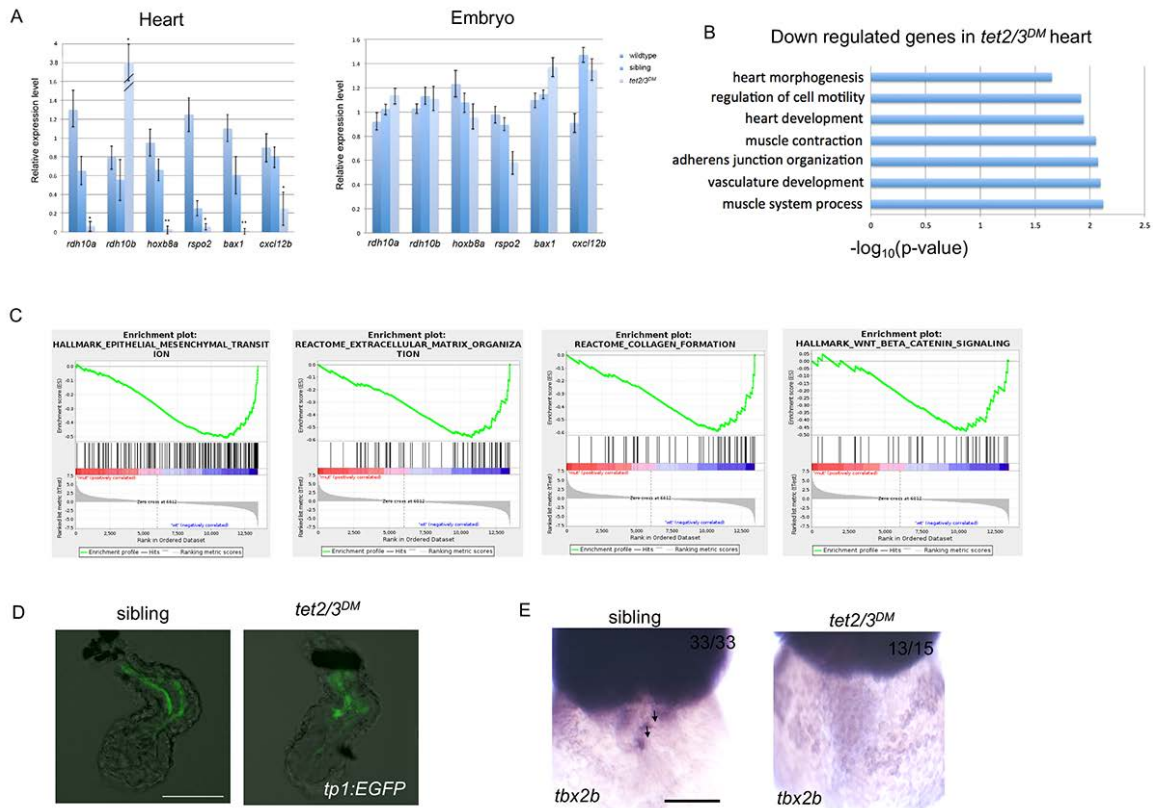

**Figure S4: *tet2/3<sup>DM</sup>* Larvae Show Cardiac AVC Defects at 48-hpf. Related to Figure 3 and Figure 4.**

(A) Quantitative RT-PCR validation of top down-regulated genes from RNA sequencing. RT-PCR analysis of *rdh10a*, *hoxb8a*, *rspo2*, *bax1*, *cxcl12b* transcripts in 2-dpf embryonic heart or whole embryo. Notably, *rdh10b* apparently compensates for the *rdh10a* loss, with 4-fold increase in *tet2/3<sup>DM</sup>* hearts, which is consistent with RNA sequencing results.

(B) GO analysis shows down-regulated biological pathways in 48 hpf *tet2/3<sup>DM</sup>* hearts compared to wildtype hearts by RNA sequencing using isolated hearts.

(C) Gene set enrichment analysis shows down-regulated biological pathways in 48-hpf *tet2/3<sup>DM</sup>* hearts compared to wildtype hearts by RNA sequencing using isolated hearts.

(D) Normal Notch Activity in *tet2/3<sup>DM</sup>* endocardium. GFP-labeled atrial endocardium indicates Notch activity in sibling hearts as well as *tet2/3<sup>DM</sup>* hearts. Hearts were dissected from 48 hpf larvae carrying the Tg(*tp1:EGFP*) Notch reporter transgene.

(E) WISH for AVC markers *tbx2b* at 48 hpf. Black arrows indicate AVC specific expression of *tbx2b* in sibling but not *tet2/3<sup>DM</sup>* heart. Scale bars: 50 $\mu\text{m}$ .

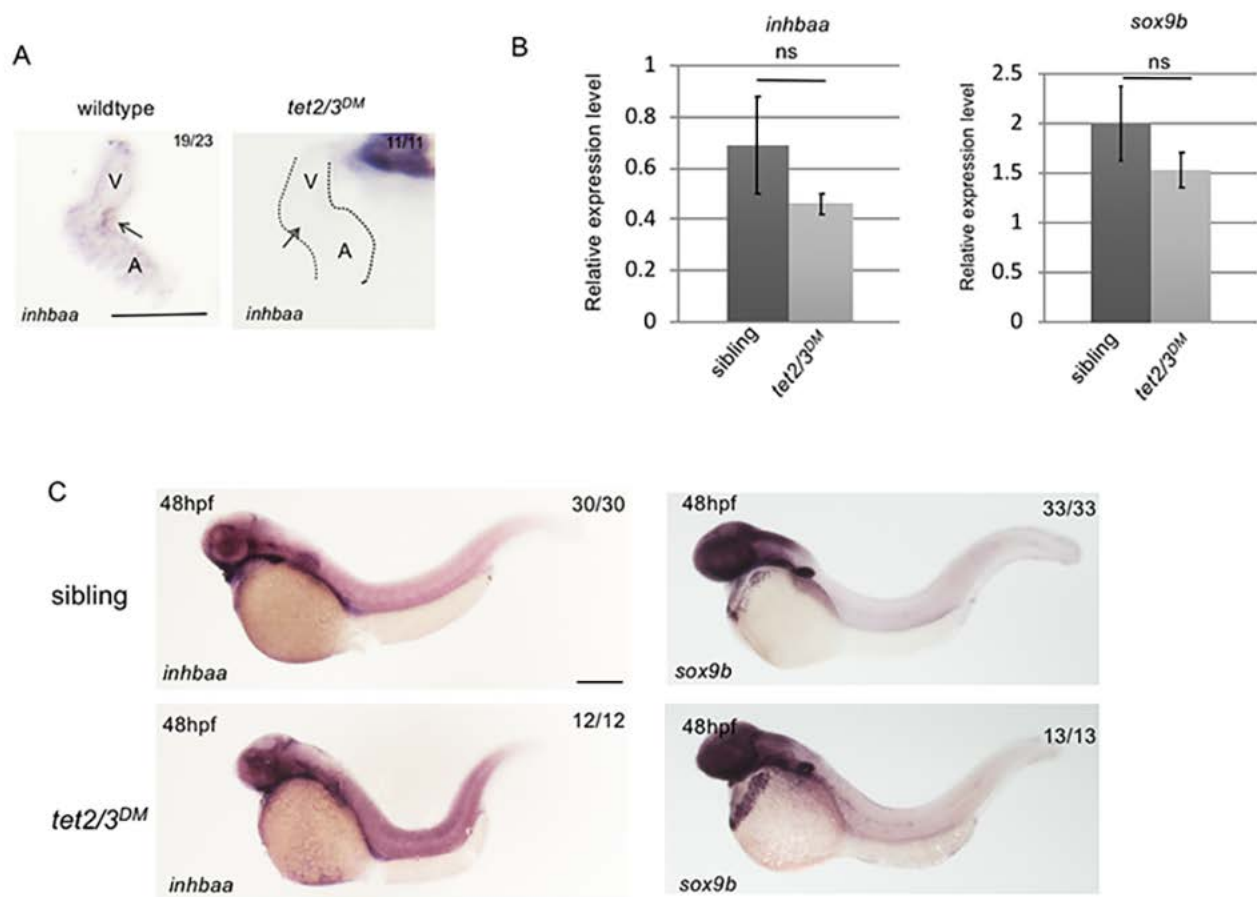

**Figure S5: *inhbaa* and *sox9b* Expression Shows Cardiac Specific Defects in *tet2/3<sup>DM</sup>* Larvae. Related to Figure 5.**

(A) WISH for *inhbaa* at 48-hpf isolated hearts. Arrows indicate AVC endocardium with *inhbaa* transcripts. Scale bar: 100  $\mu$ m.

(B) RT-PCR analysis of *inhbaa* and *sox9b* transcripts in representative 48-hpf embryos.

(C) WISH for *inhbaa* and *sox9b* in representative 48-hpf embryos. Scale bar: 300  $\mu$ m.

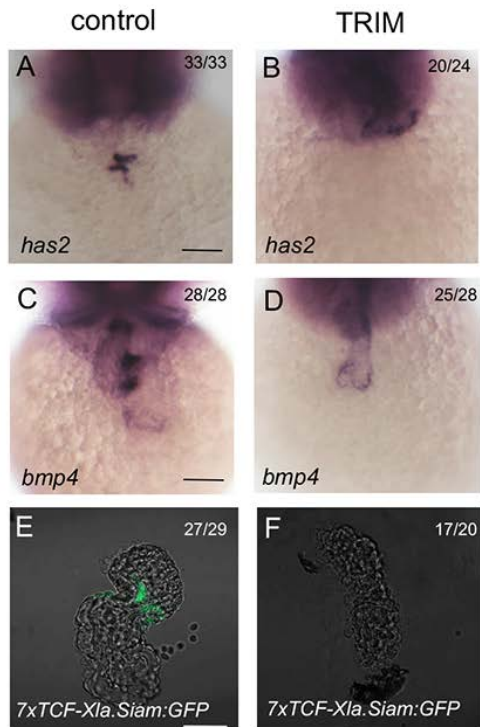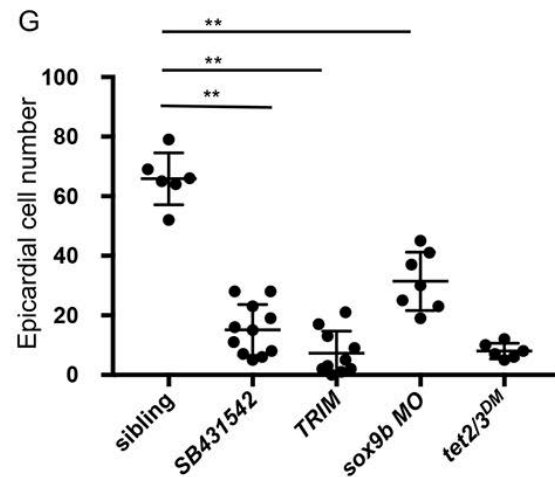

**Figure S6: Inhibiting the Activin-A Pathway or *sox9b* Causes AVC Disruption and PE Migration Defect. Related to Figure 5.**

(A-D) WISH for AVC markers *has2* and *bmp4* at 48-hpf in wildtype or TRIM treated larvae.

(E-F) GFP-labeled AVC endocardium represents Wnt activity in wildtype but not TRIM treated heart. Hearts were dissected from 48-hpf larvae carrying the Tg(*7xTCF-Xla.Siam:GFP*) transgene.

(G) Number of epicardial cells in the heart of 4-dpf sibling, sibling exposed to SB431542 or TRIM from 24 hpf, *sox9b* morphant and *tet2/3<sup>DM</sup>* larvae carrying the Tg(*tcf21:NLS-EGFP*) transgene. Data are presented as the mean ± SD. The significance is indicated as \*\*P < 0.01.

Scale bar: 50µm.

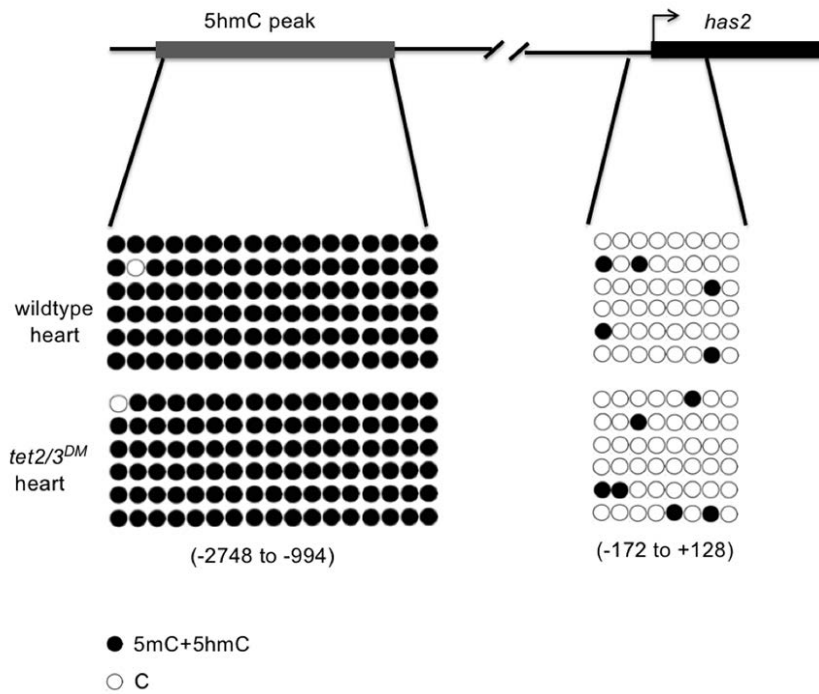

**Figure S7. No Hypermethylation at the Promoter of the *has2* Gene in *tet2/3<sup>DM</sup>* Hearts. Related to Figure 6.**  
 Diagram indicates *has2* locus and the associated regulatory regions. Gray box represents a 5hmC peak. Black box represents the coding sequence. Profiles of 5mC + 5hmC in the putative promoter regions revealed by bisulfite sequencing. Numbers indicate regions analyzed relative to the translation start site.



| bis-sequence primer  |    | 5'--3'                                 |
|----------------------|----|----------------------------------------|
| <i>inhbaa</i>        | F  | TTTGGGGGGGGGGTTTTTATTG                 |
|                      | R  | AATAAAAAAACACATACTTAACATACTAC          |
| <i>sox9b</i>         | F  | TGTGTTTATTTGTGTTGGTGATGTTGTGG          |
|                      | R  | ACAAAAAACTACAATAACCATACTAAAATCTC       |
| <i>has2-promoter</i> | F1 | GTATGTTTGTATTGTGGGGGAAATTTGAGGGTTTGGAG |
|                      | R1 | TCATTATTTCAATTCATTTTCTTTTCAACTTAATCCC  |
|                      | F2 | AAAAGATTGTTGAGGTGTTGAAGG               |
|                      | R2 | CAAAATCAATTACACATAACCTCTCAATAATAC      |
| <i>has2-exon1</i>    | F  | ATTTGAAGGGGTAGTATTTTTTTTTTTTAGATGTTG   |
|                      | R  | CATTCAAATTTTTTTTTTCCCAAAC              |

| qRT-PCR primer |   | 5'---3'                  |
|----------------|---|--------------------------|
| <i>inhbaa</i>  | F | GCACATTCAGAAGCCGACTGCC   |
|                | R | TAAAGTCCGTCTGCCTGTGCGC   |
| <i>sox9b</i>   | F | AGGTGCTGAAGGGCTACGACTGGT |
|                | R | GATTCCTCCGTCTGGGCTGGTATT |
| <i>cxcl12b</i> | F | CAAGTCATTGCCAAGCTGAAG    |
|                | R | CTCGTCTGTTTACTCTGAGCG    |
| <i>rdh10a</i>  | F | AGTTCACTGGGCCTTTTCAG     |
|                | R | ACACCAGCGTCATCTTGATAC    |
| <i>hoxb8a</i>  | F | ACAACCTGTTCCCGTGGATG     |
|                | R | TGTGACACTTCAATCCGACG     |
| <i>rspo2</i>   | F | TCCAACCATCGCTGAATCTAG    |
|                | R | TCGCTGTGTTGGTTCTGAG      |
| <i>barx1</i>   | F | CCGGATCAGAAGGTATCAAGTC   |
|                | R | GGAAACTTCAGGATACCCGTC    |
| <i>b-actin</i> | F | CGAGCAGGAGATGGGAACC      |
|                | R | CAACGGAAACGCTCATTGC      |
| <i>rdh10b</i>  | F | GAGAGCCATACTAACAGACCAG   |
|                | R | AGGGTACATGCACTTATCAGC    |

| mRNA generation primer  | 5'--3'             |                          |  |
|-------------------------|--------------------|--------------------------|--|
| EcoRI- <i>inhbaa</i> -F | CG GAATTC          | AGTCCCAGACCTCTTACGAG     |  |
| XhoI- <i>inhbaa</i> -R  | CTAACG CTCGAG      | ttacgagcagccgattctt      |  |
| ECORI- <i>sox9b</i> -F  | CG GAATTC          | ttataacacacacgcgtgcg     |  |
| XhoI- <i>sox9b</i> -R   | CTAACG CTCGAG      | TCAGGGTCTGGACAGCTGTG     |  |
| BamHI- <i>has2</i> -F   | CTGGGATCC          | ATGAGATGTGATAAAGCGGTCAGC |  |
| XhoI- <i>has2</i> -R    | GTC <b>ACTCGAG</b> | CTATACGTCAAGAACCATGTC    |  |

**Table S1. PCR Primer Sequences Used in the Paper. Related to Figure 5 and Figure 6.**

|                   |
|-------------------|
| <i>alpi.1</i>     |
| <i>amer2</i>      |
| <i>ets2</i>       |
| <i>foxa3</i>      |
| <i>g6pc3</i>      |
| <i>gmpr</i>       |
| <i>inhbaa</i>     |
| <i>lama4</i>      |
| <i>nog2</i>       |
| <i>pecam1</i>     |
| <i>psid</i>       |
| <i>pts</i>        |
| <i>rtn4rl2a</i>   |
| <i>slit1a</i>     |
| <i>sox9b</i>      |
| <i>spag1a</i>     |
| <i>srl</i>        |
| <i>trim69</i>     |
| <i>tyr</i>        |
| <i>zgc:153184</i> |

Table S2. Genes have hyper-DMR in 2 kb upstream and downstream of transcription start sites as well as transcriptional downregulation in *tet2/3<sup>DM</sup>* hearts (fold change >2). Related to Figure 5.
